# Supplementary material for: Hemoglobin Video Imaging Provides Novel In Vivo High-Resolution Imaging and Quantification of Human Aqueous Outflow in Patients with Glaucoma
Source: PubMed Central journal article supplement (PMC6876656; doi:10.1016/j.ogla.2019.04.001), 2019
Supplement: mmc1.pdf [file mmc1.pdf]

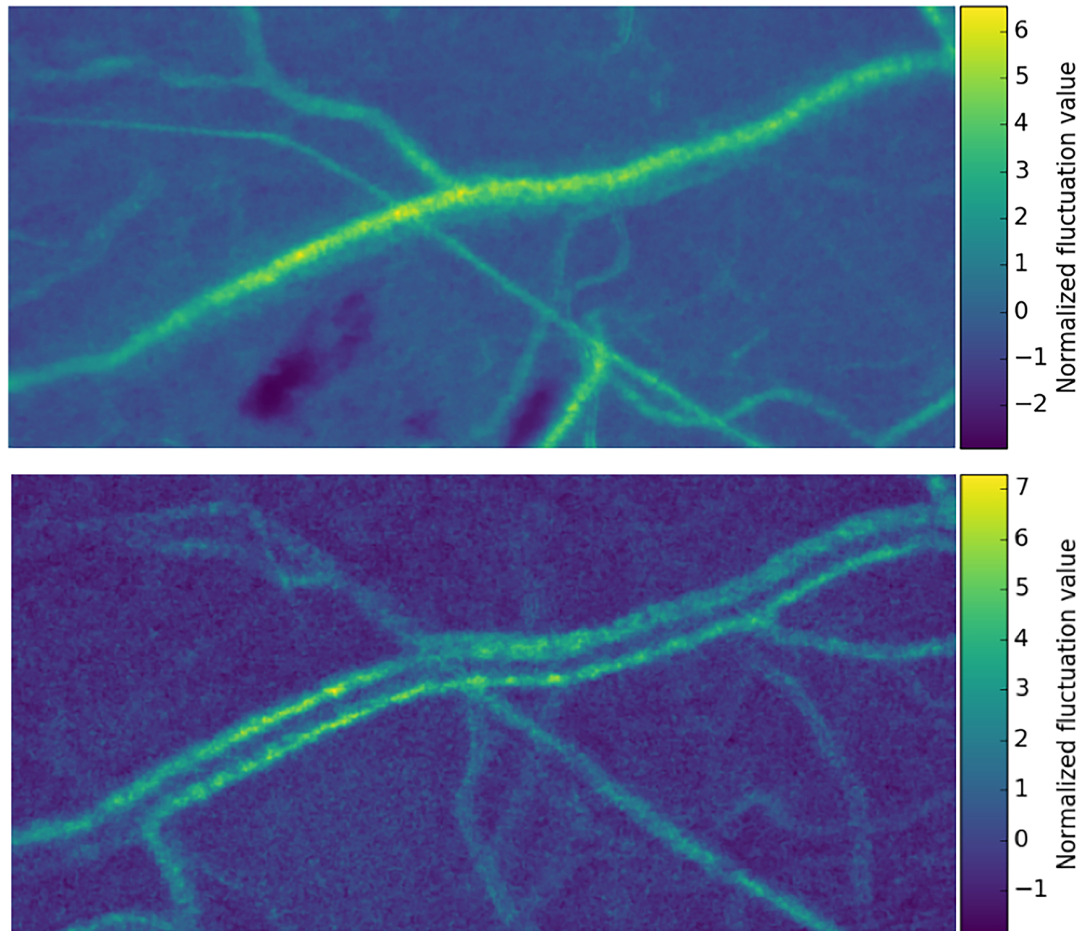

**Supplementary figure 1:** (Top) Pre intervention image. (Bottom) Post intervention image. Notice the relative intensity increase of the treated vessel – the contrast of the vessel relative to the background is enhanced in comparison to the original by approximately one standard deviation.
