# Supplementary material for: Hemoglobin Video Imaging Provides Novel In Vivo High-Resolution Imaging and Quantification of Human Aqueous Outflow in Patients with Glaucoma
Source: PubMed Central journal article supplement (PMC6876656; doi:10.1016/j.ogla.2019.04.001), 2019
Supplement: mmc2.pdf [file mmc2.pdf]

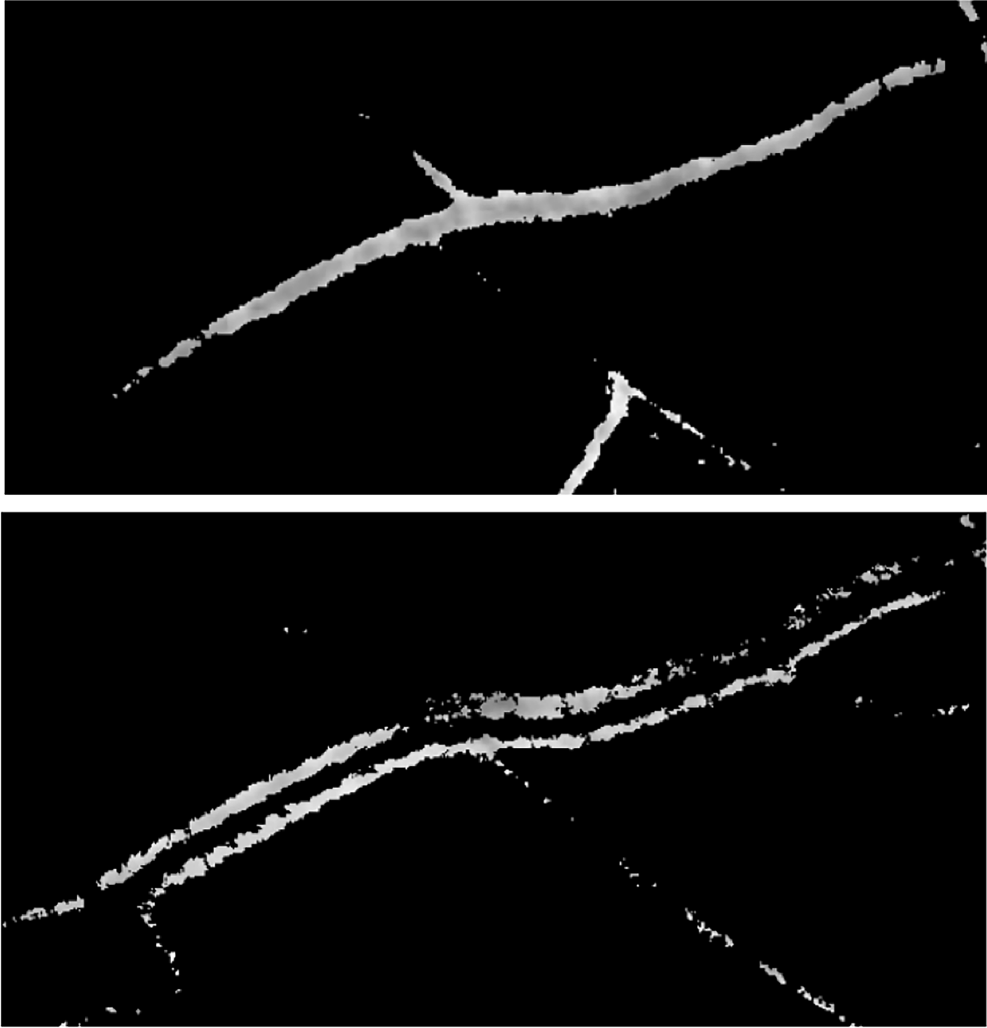

**Supplementary figure 2:** Example of segmented images for blood flow in an aqueous vein before intervention (top) and after intervention (bottom).
